# Supplementary material for: Neurological Improvement via Lysophosphatidic Acid Administration in a Rodent Model of Cardiac Arrest-Induced Brain Injury
Source: MDPI journal article supplement (doi:10.3390/ijms242417451), 2023-12-14
Supplement: s1 [file s1]

## **Supplementary to**

# **Neurological Improvement via Lysophosphatidic acid Administration in a Rodent Model of Cardiac Arrest-Induced Brain Injury Supplementary to**

**Mitsuaki Nishikimi <sup>1,2</sup>, Rishabh C. Choudhary <sup>1,2</sup>, Muhammad Shoaib <sup>1,3</sup>, Tsukasa Yagi <sup>1,2</sup>, Lance B. Becker <sup>1-3</sup>, and Junhwan Kim <sup>1-3,\*</sup>**

**Supplemental Table S1.** Modified neurological deficit score (mNDS)

| mNDS                     |                                                      |                    |                 |
|--------------------------|------------------------------------------------------|--------------------|-----------------|
| <b>1. General</b>        |                                                      |                    |                 |
| Consciousness            | Unresponsive (0), depressed (50), normal (100)       |                    |                 |
| Respiration              | Abnormal (<60 or >120) (0), normal (100)             |                    |                 |
|                          |                                                      | Total points       |                 |
| <b>2. Cranial nerves</b> |                                                      |                    |                 |
| Olfactory                | Orient to smell: no (0), yes (20)                    |                    |                 |
| Vision                   | Visual stimulus startle response: no (0), yes (20)   |                    |                 |
| Corneal reflex           | Blink response to corneal stimulus: no (0), yes (20) |                    |                 |
| Whisker movement         | Spontaneous: no (0), yes (20)                        |                    |                 |
| Hearing                  | Startle response to loud noise: no (0), yes (20)     |                    |                 |
|                          |                                                      | Total points       |                 |
| <b>3. Motor</b>          |                                                      |                    |                 |
| Left forepaw             | Spontaneous or withdraw from pain: no (0), yes (10)  |                    |                 |
| Right forepaw            | Spontaneous or withdraw from pain: no (0), yes (10)  |                    |                 |
| Left hindpaw             | Spontaneous or withdraw from pain: no (0), yes (10)  |                    |                 |
| Right hindpaw            | Spontaneous or withdraw from pain: no (0), yes (10)  |                    |                 |
| Tail                     | Spontaneous or withdraw from pain: no (0), yes (10)  |                    |                 |
|                          |                                                      | Total points       | /50             |
| <b>4. Sensory</b>        |                                                      |                    |                 |
| Left forepaw             | React to pain: no (0), yes (10)                      |                    |                 |
| Right forepaw            | React to pain: no (0), yes (10)                      |                    |                 |
| Left hindpaw             | React to pain: no (0), yes (10)                      |                    |                 |
| Right hindpaw            | React to pain: no (0), yes (10)                      |                    |                 |
| Tail                     | React to pain: no (0), yes (10)                      |                    |                 |
|                          |                                                      | Total points       | /50             |
| <b>5. Coordination</b>   |                                                      |                    |                 |
| Ledge traverse           | no (0), yes (25)                                     |                    |                 |
| Righting reflex          | no (0), yes (25)                                     |                    |                 |
| Placing test             | no (0), yes (25)                                     |                    |                 |
| Stop at table edge       | no (0), yes (25)                                     |                    |                 |
|                          |                                                      | Total points       |                 |
|                          |                                                      | <b>Total score</b> |                 |
|                          |                                                      | <b>Percent NDS</b> | <b>(0-100%)</b> |

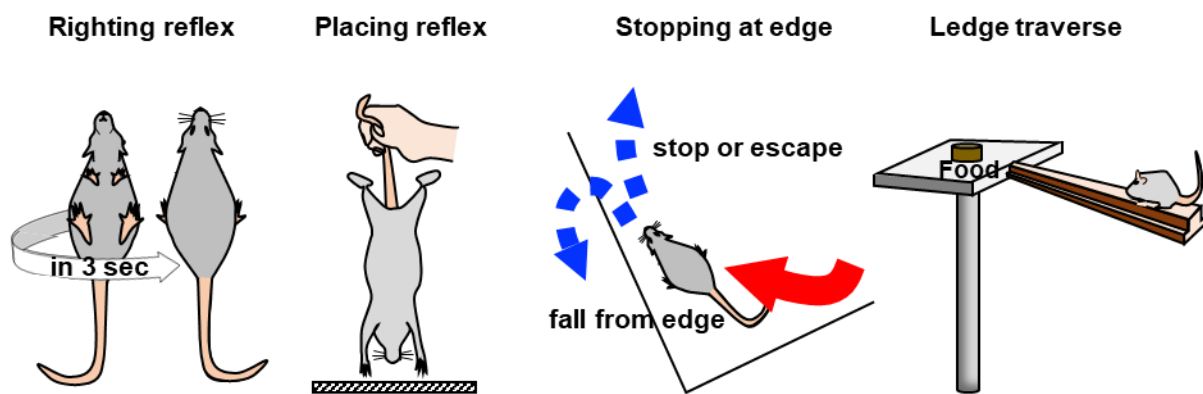

**Supplemental Figure S1.** Graphic illustration of four coordination skills tests.
